# Supplementary material for: Honeycomb architecture of carbon quantum dots: a new efficient substrate to support gold for stronger SERS
Source: Royal Society of Chemistry journal article supplement (doi:10.1039/c2nr12015a), 2012-01-01
Supplement: c2nr12015a.pdf [file c2nr12015a.pdf]

## Electronic Supplementary Information

### Honeycomb Architecture of Carbon Quantum Dots: A New Efficient Substrate to Support Gold for Stronger SERS

Yueqiong Fan, Huhu Cheng, Ce Zhou, Xuejun Xie, Yong Liu, Liming Dai, Jing Zhang, and Liangti Qu

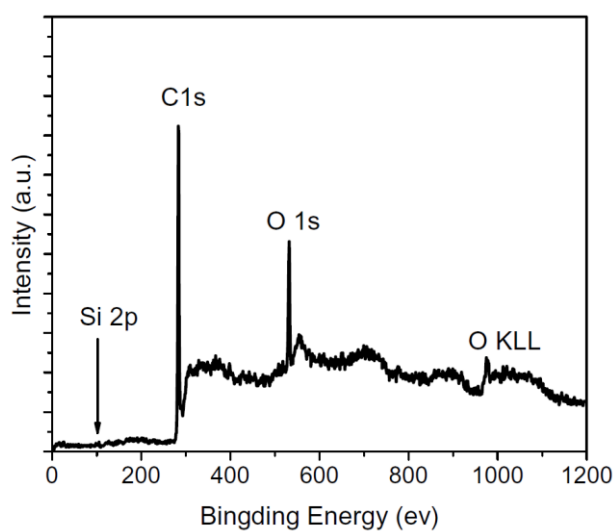

**Figure S1.** XPS spectrum of final CGQ honeycomb after removing SiO<sub>2</sub>.
